# Supplementary material
Source: Springer Nature journal article supplement (https://www.springermedizin.de/resource/supplementary/13063_2014_2095_MOESM9_ESM.pdf/9621324)
Supplement: MOESM9 [file 9621324]

Table 1: Timing of assessments

|                                                        | Screening | Baseline | 4 months<br>post baseline | 9 months<br>post baseline | 12 months<br>post baseline |
|--------------------------------------------------------|-----------|----------|---------------------------|---------------------------|----------------------------|
| PHQ-9                                                  | X         |          | X                         | X                         | X                          |
| CIS-R                                                  | X         |          | X                         | X                         |                            |
| Physical Activity<br>-7 day PA recall<br>Accelerometer |           | X        | X<br>X                    | X                         |                            |
| Body Mass Index<br>Blood pressure                      |           | X<br>X   | X<br>X                    | X<br>X                    |                            |
| Health and social care<br>service use -ADSUS           |           | X        | X                         | X                         |                            |
| Sleep - Insomnia<br>Severity Index                     |           | X        | X                         | X                         |                            |
| Quality of life<br>-SF-36<br>-EQ5D                     |           | X<br>X   | X<br>X                    | X<br>X                    |                            |
